# Supplementary material for: Prognostic value of chemotherapy in addition to concurrent chemoradiotherapy in T3-4N0-1 nasopharyngeal carcinoma: a propensity score matching study
Source: PubMed Central journal article supplement (PMC5652744; doi:10.18632/oncotarget.20014), 2017-08-07
Supplement: oncotarget-08-76807-s001.pdf [file oncotarget-08-76807-s001.pdf]

## Prognostic value of chemotherapy in addition to concurrent chemoradiotherapy in T3-4N0-1 nasopharyngeal carcinoma: a propensity score matching study

### SUPPLEMENTARY MATERIALS

**Supplementary Table 1: Results of multivariate analysis for 236 pairs with T3-4N0-1 NPC**

| Endpoints          | Variable                                        | HR (95%CI)          | <i>P</i> <sup>a</sup> |
|--------------------|-------------------------------------------------|---------------------|-----------------------|
| OS <sup>b</sup>    | Treatment group, CCRT plus IC/AC vs. CCRT alone | 0.964 (0.620-1.499) | 0.869                 |
|                    | Age, ≥ 49y vs. < 49y                            | 1.021 (0.473-2.204) | 0.957                 |
|                    | Gender, male vs. female                         | 1.871 (0.892-3.922) | 0.097                 |
|                    | Smoking, yes vs. no                             | 0.713 (0.448-1.136) | 0.155                 |
|                    | Drinking, yes vs. no                            | 0.923 (0.414-2.055) | 0.844                 |
|                    | KPS, ≥ 90 vs. ≤ 80                              | 1.294 (0.778-2.153) | 0.321                 |
|                    | N category, N1 vs. N0                           | 1.260 (0.811-1.957) | 0.304                 |
|                    | Overall stage, IV vs. III                       | 2.682 (1.289-5.580) | 0.008                 |
| DFFS <sup>c</sup>  | Treatment group, CCRT plus IC/AC vs. CCRT alone | 1.036 (0.626-1.714) | 0.890                 |
|                    | Age, ≥ 49y vs. < 49y                            | 0.737 (0.339-1.603) | 0.442                 |
|                    | Gender, male vs. female                         | 1.993 (0.949-4.189) | 0.069                 |
|                    | Smoking, yes vs. no                             | 0.781 (0.464-1.316) | 0.354                 |
|                    | Drinking, yes vs. no                            | 0.732 (0.285-1.880) | 0.517                 |
|                    | KPS, ≥ 90 vs. ≤ 80                              | 1.213 (0.691-2.131) | 0.501                 |
|                    | N category, N1 vs. N0                           | 1.365 (0.647-2.880) | 0.413                 |
|                    | Overall stage, IV vs. III                       | 2.099 (1.139-3.868) | 0.005                 |
| LRFFS <sup>d</sup> | Treatment group, CCRT plus IC/AC vs. CCRT alone | 0.670 (0.338-1.327) | 0.250                 |
|                    | Age, ≥ 49y vs. < 49y                            | 0.804 (0.411-1.573) | 0.524                 |
|                    | Gender, male vs. female                         | 2.301 (0.811-6.542) | 0.117                 |
|                    | Smoking, yes vs. no                             | 0.560 (0.197-1.590) | 0.276                 |
|                    | Drinking, yes vs. no                            | 0.868 (0.267-2.821) | 0.814                 |
|                    | KPS, ≥ 90 vs. ≤ 80                              | 0.712 (0.357-1.419) | 0.335                 |
|                    | N category, N1 vs. N0                           | 1.122 (0.428-2.943) | 0.815                 |
|                    | Overall stage, IV vs. III                       | 1.206 (0.614-2.373) | 0.586                 |

NPC = nasopharyngeal carcinoma; OS = overall survival; DFFS = distant failure-free survival; LRFFS = locoregional failure-free survival; HR = hazard ratio; CI = confidence interval; CCRT = concurrent chemoradiotherapy; IC = induction chemotherapy; AC = adjuvant chemotherapy.

<sup>a</sup> Multivariate *P*-values were calculated using an adjusted Cox proportional-hazards model with backward elimination and the following parameters: age (≥ 49y vs. < 49y), gender (male vs. female), smoking (yes vs. no), drinking (yes vs. no), KPS (≥ 90 vs. ≤ 80), N category (N1 vs. N0), overall stage (IV vs. III), concurrent chemotherapy regimen (TP vs. PF) and treatment group (CCRT plus IC/AC vs. CCRT).

<sup>b</sup> Forty patients in the CCRT and 40 patients in the CCRT plus IC/AC were dead (*P* = 1.000).

<sup>c</sup> Thirty-one in the CCRT and 32 patients in the CCRT plus IC/AC experienced distant metastasis (*P* = 0.892).

<sup>d</sup> Twenty in the CCRT and 15 patients in the CCRT plus IC/AC developed locoregional recurrence (*P* = 0.380).
